# Supplementary material for: The Biomedical Alliance Spring Meeting on Plan S
Source: Oxford University Press journal article supplement (doi:10.1093/eurheartj/ehz492), 2019-07-14
Supplement: ehz492_supplementary_material.docx [file ehz492_supplementary_material.docx]

# CP 4027

# References are available as supplementary material at *European Heart Journal* online

**Title: The Biomedical Alliance Spring Meeting on Plan S**

**References:**

1. Lüscher T.F. The future of Scientific Publishing. EuroIntervention 2019; online.
2. Haug C.J. No free lunch – what price of plan S for scientific publishing. New Engl. J. Med. 2019; 380: 1181-1185.
3. Tomasz J Guzik, Amrita Ahluwalia., Plan S: in Service or Disservice to Society? *European Heart Journal*, Volume 40, Issue 12, 21 March 2019, Pages 949–952,
